# Supplementary figures and images for: A Traceless Selection: Counter-selection System That Allows Efficient Generation of Transposon and CRISPR-modified T-cell Products
Source: PubMed Central journal article supplement — Mol Ther Nucleic Acids. 2016 Mar 22;5(3):e298–. doi: 10.1038/mtna.2016.13 (PMC5014455; doi:10.1038/mtna.2016.13), 2016-03-22

A

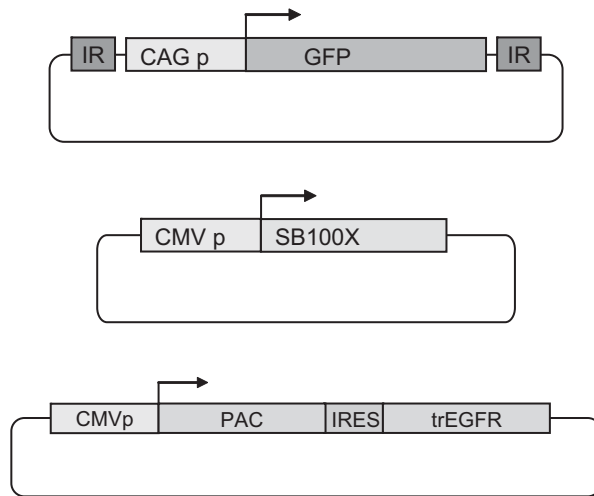

B

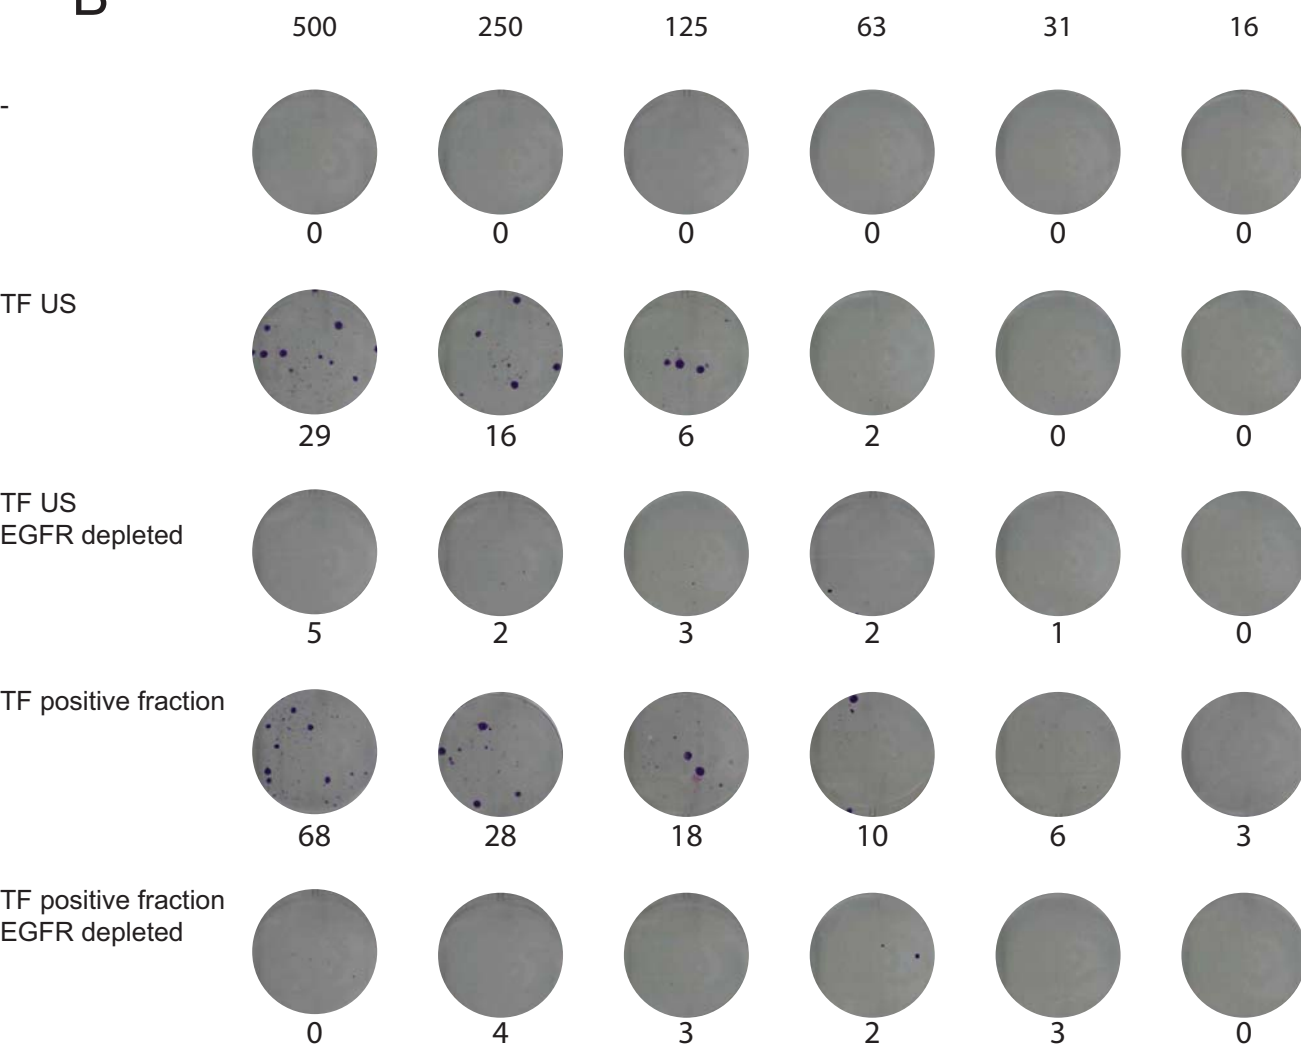

Supplement: mtna201613x5.pdf [file mtna201613x5.pdf]
